# Supplementary material for: Medulloblastoma rendered susceptible to NK-cell attack by TGFβ neutralization
Source: Springer Nature journal article supplement (doi:10.1186/s12967-019-2055-4), 2019-09-23

FIGURE S1

A

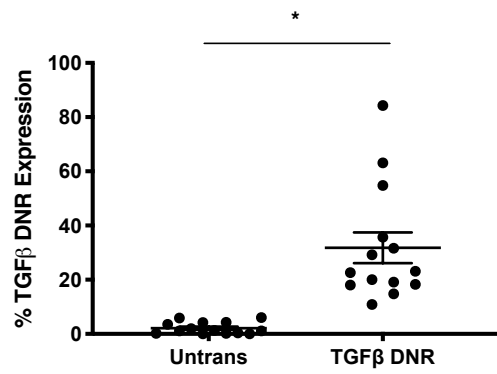

B

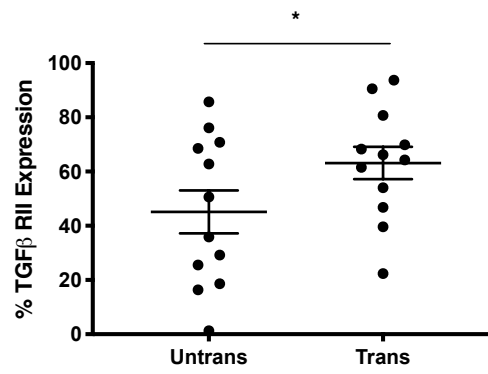

C

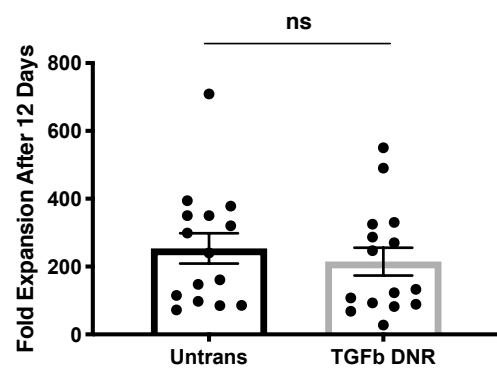

D

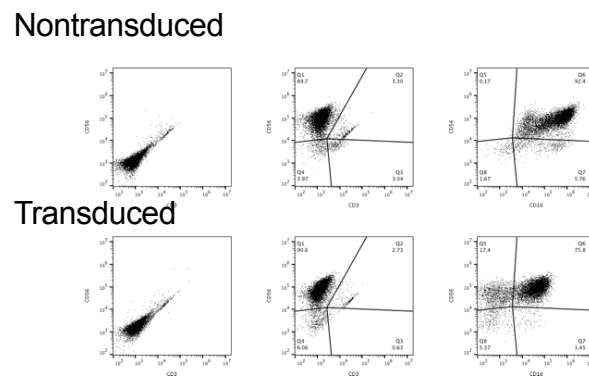

E

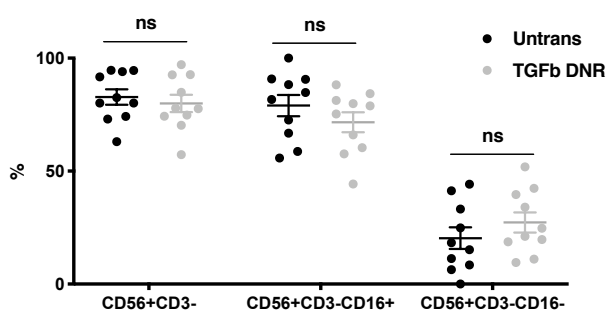

F

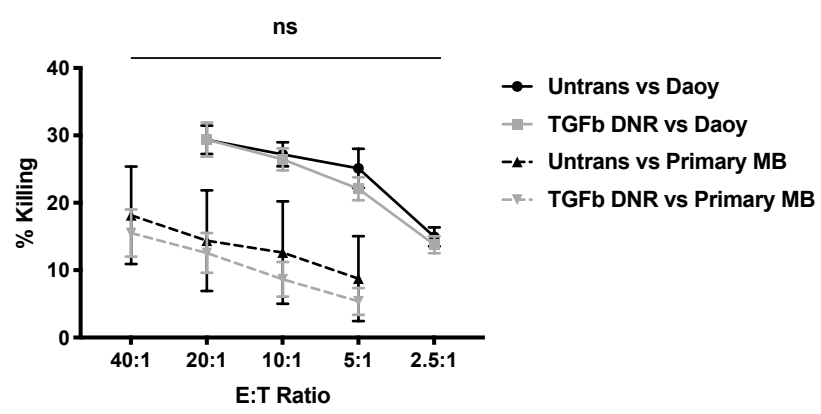

G

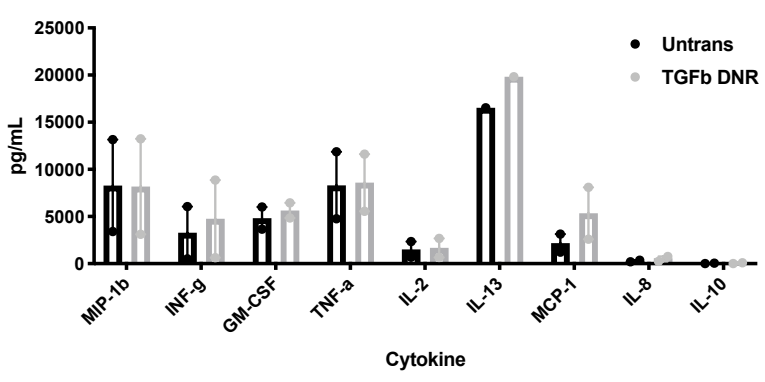

FIGURE S2

A

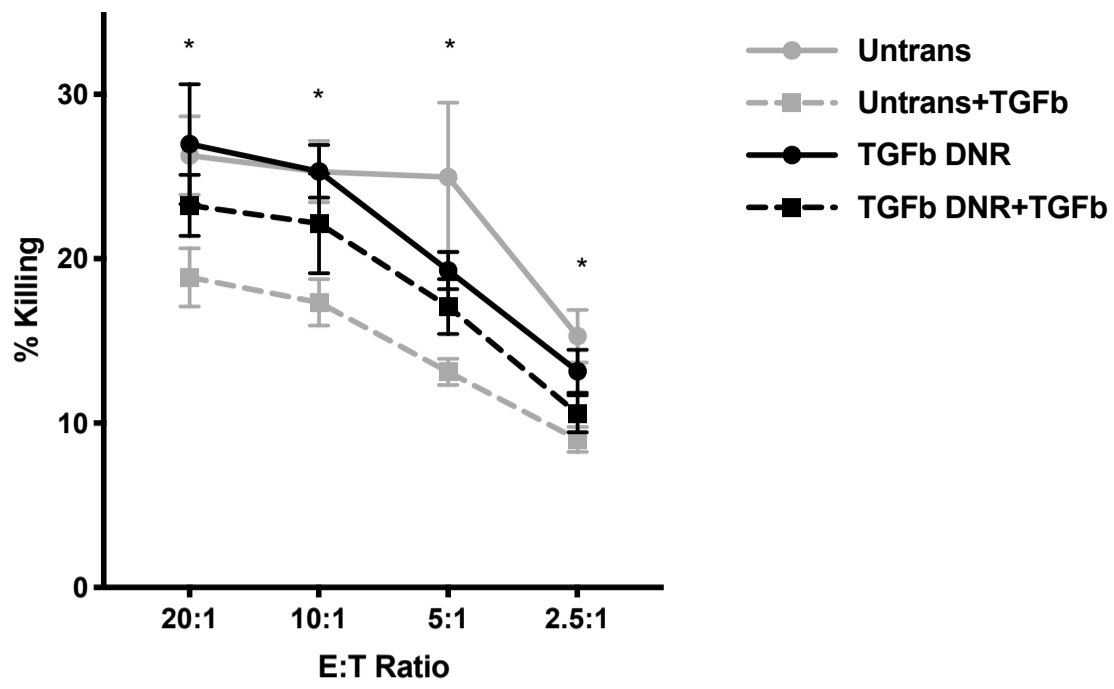

B

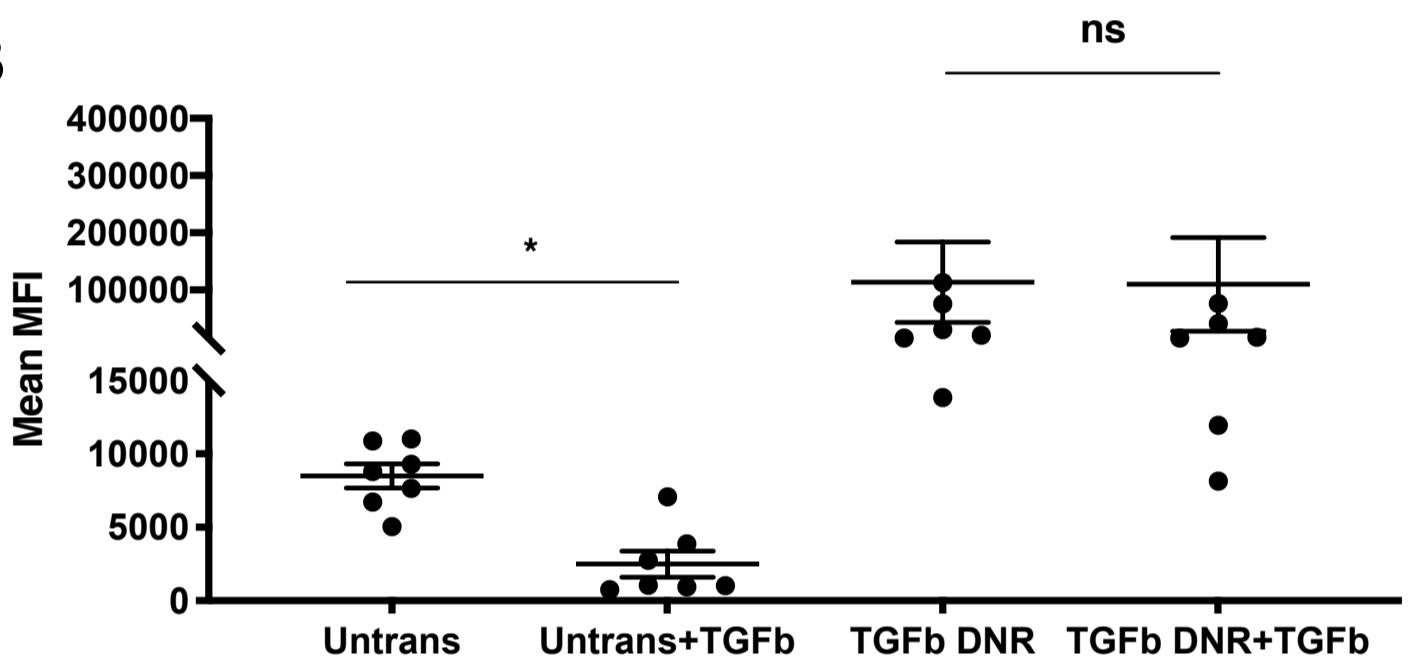

FIGURE S3

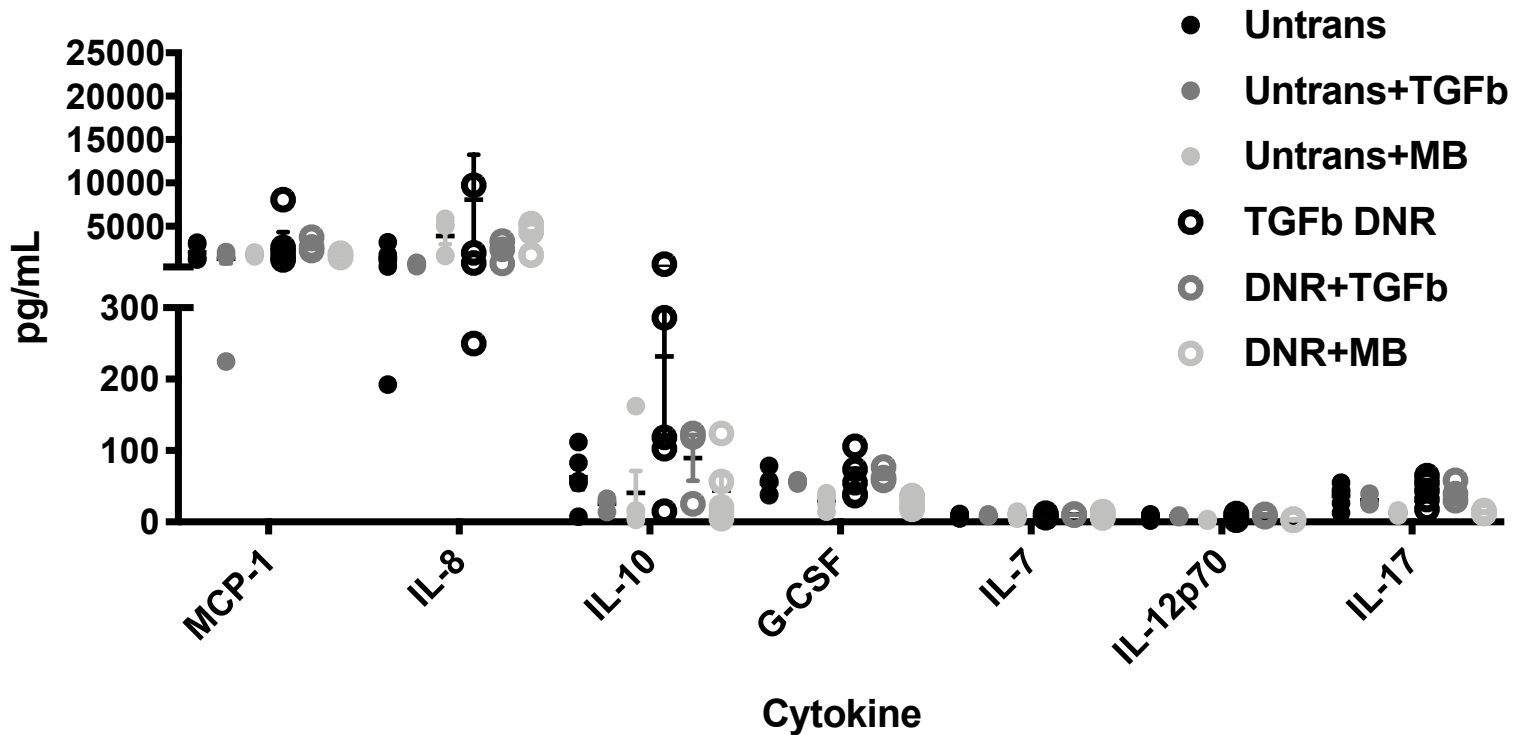

# FIGURE S4

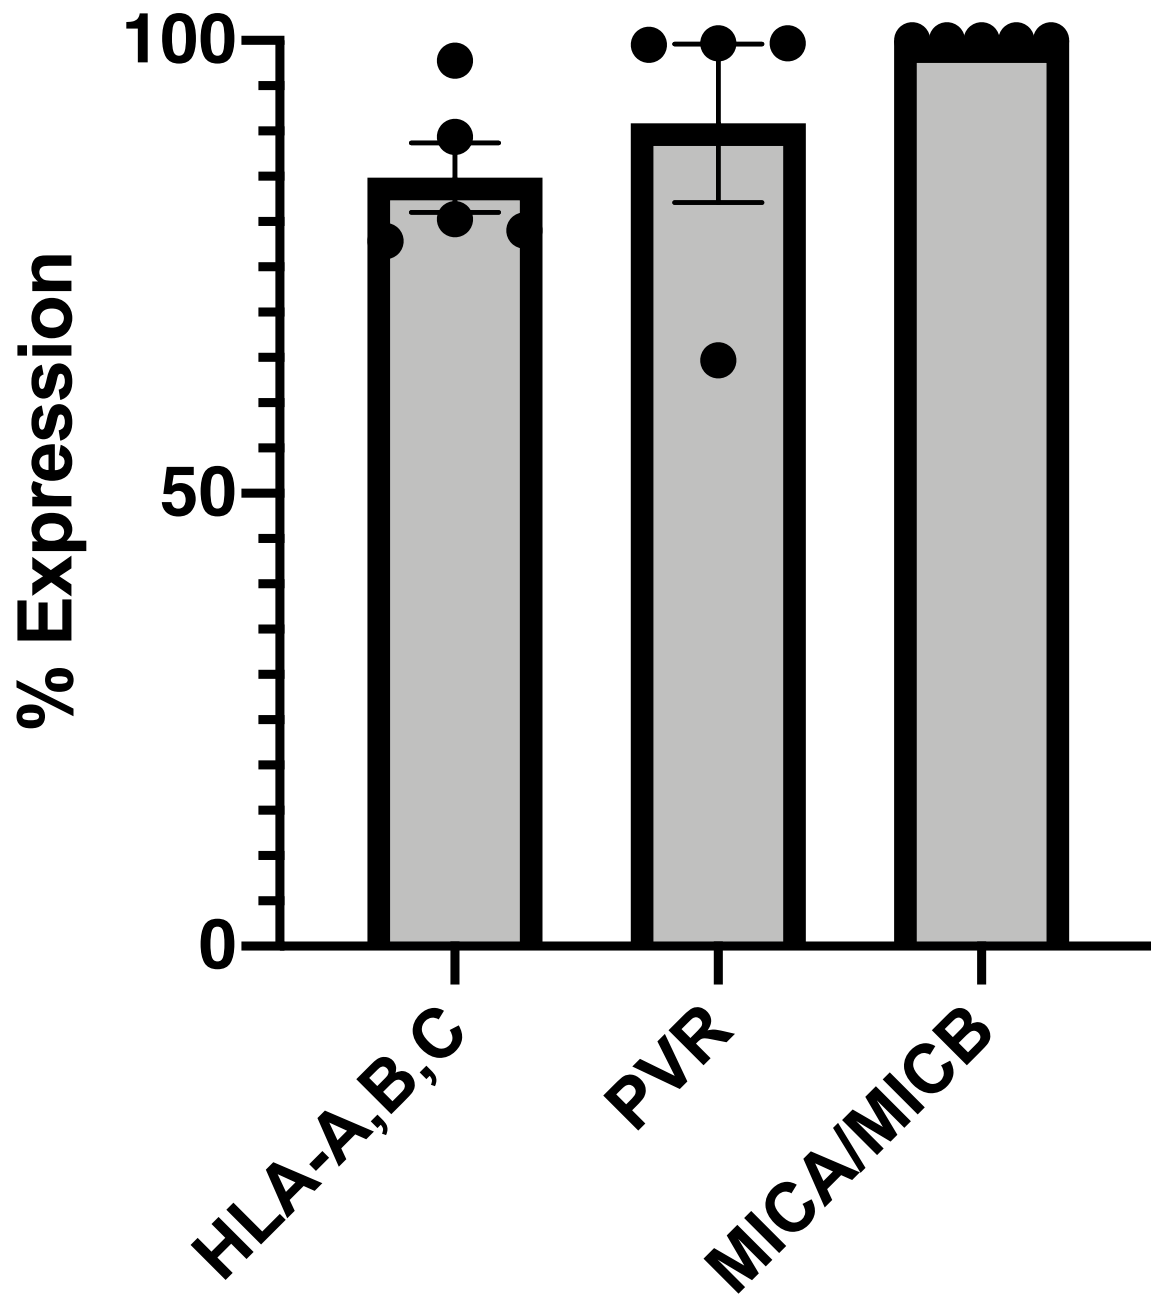

FIGURE S5

A

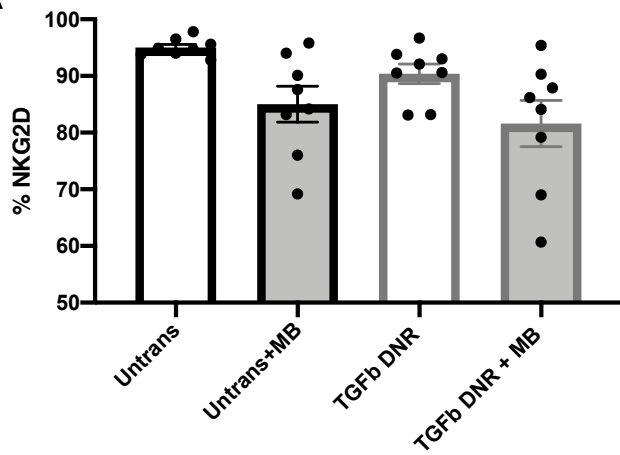

B

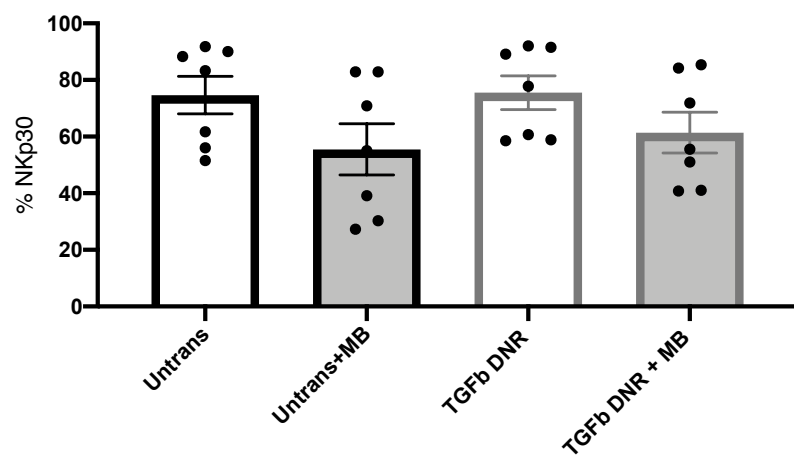

C

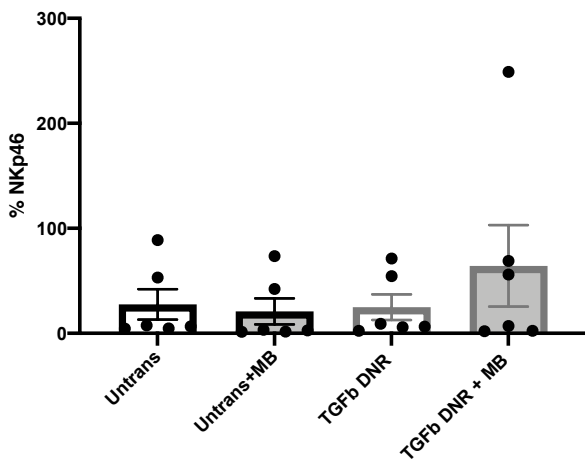

D

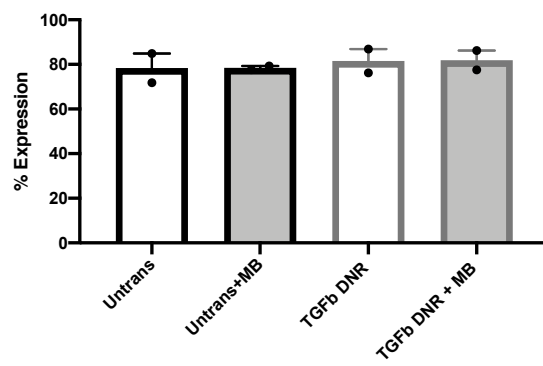

E

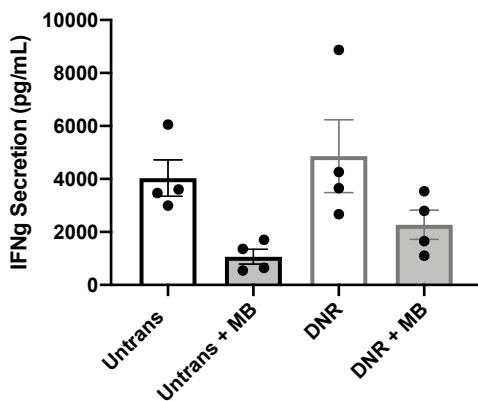

F

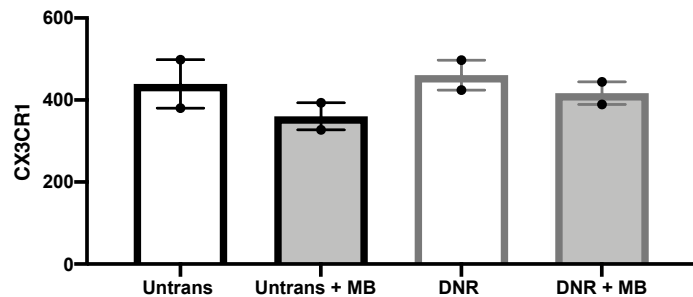

FIGURE S6

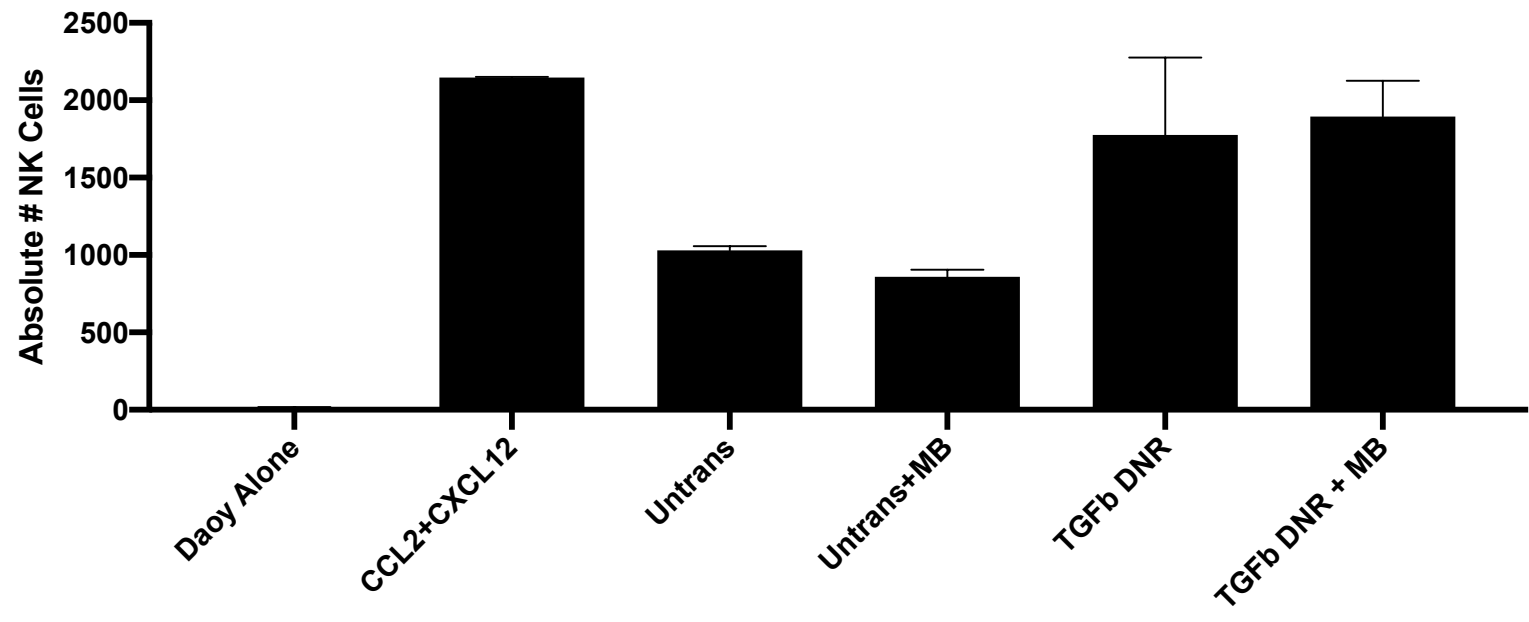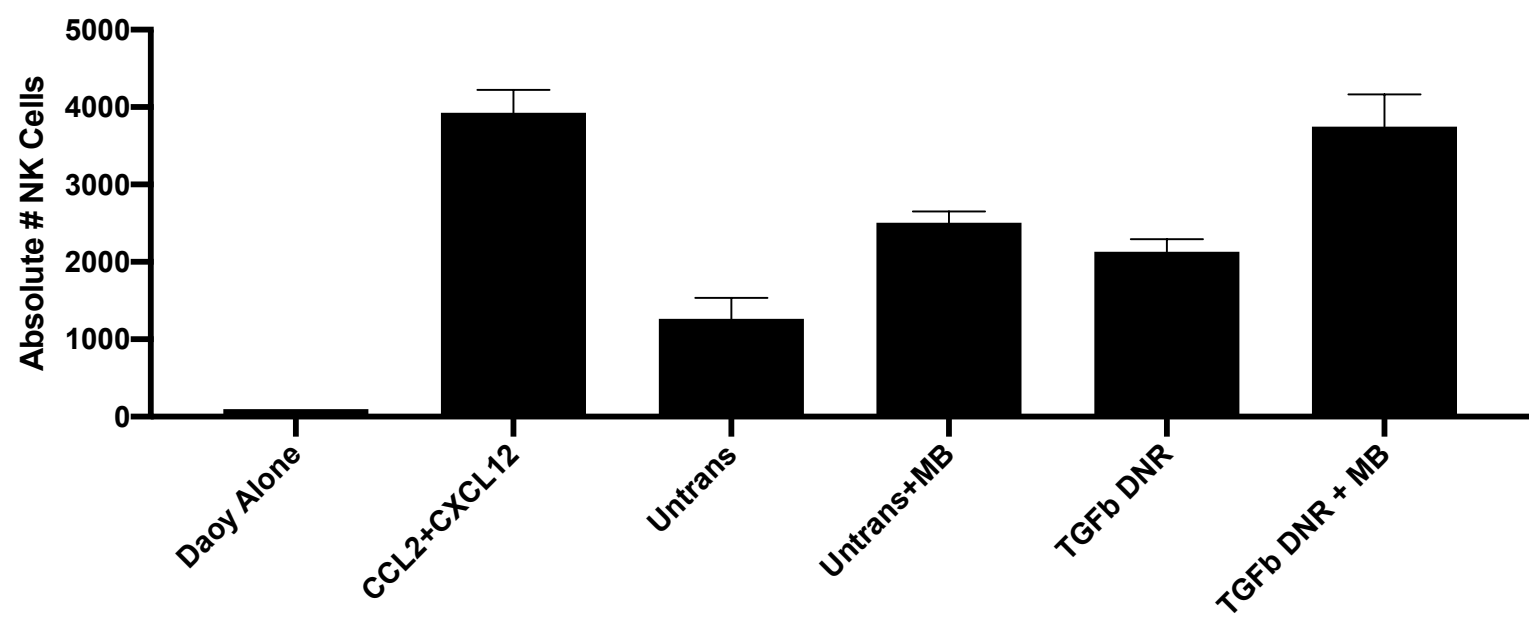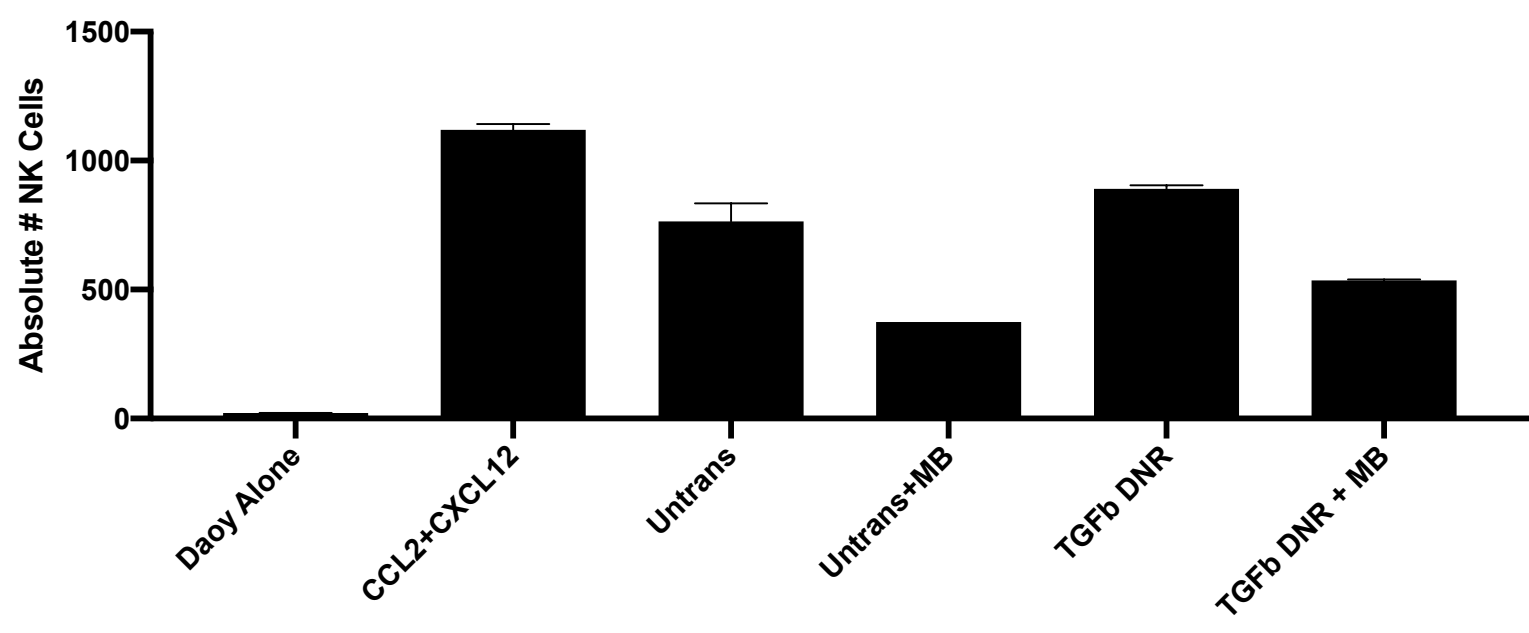

Supplement: MOESM1 [file 17199688]
